# Supplementary material for: Statistical geoeffectiveness of solar-interplanetary disturbance events of type II radio bursts and CMEs/shocks
Source: Frontiers journal article supplement (doi:10.3389/fspas.2024.1452513), 2024-08-30
Supplement: Table_2.xlsx [file Table_2.xlsx]

## Sheet: Sheet1
NOTES:``Type II burst-shock'' events refers to the type II bursts associated with the shocks reaching Earth, indicating type II burst events effective on Earth. These events are identified based on the following criteria: a frequency drift lasting from several hours to 4–5 days from the beginning of the type II. When the frequency decreases to approximately 30 kHz, the wind spacecraft can detect …
Events	First C2 Appearance Date Time of CME[UT]	Date Time of Type II Burst[UT]	Date Time of Shock[UT]	Date Time of Disturbance[UT]	Date Time of ICME[UT]	Dst Index	Peak Time of Dst Index[UT]	Type of Shock	Frequency of Type II Burst(kHz)	Central PA [deg]	Angular Width [deg]	Linear Speed [km/s]	2nd-order Speed at final height [km/s]	2nd-order Speed at 20 Rs [km/s]	Accel [m/s2]	Mass [gram]	Kinetic Energy [erg]	MPA [deg]	Velocity of ICME(km/s)	Velocity of ICME_max (km/s)	Velocity of ICME_transit (km/s)
type II burst-shock	19970106 1510	19970108 0200-199701110200	19970110 0052	19970110 0104	19970110 0400-19970111 0200	-78	19970110 1000	FF	270-80	Halo(S)	360	136	224	319	4.1	5.8e+14*2	5.4e+28*2	180	450	460	507
type II burst-shock	19970407 1427	19970407 1430-19970407 1730	19970410 1258	19970410 1745	19970411 0600-19970411 1900	-82	19970411 0500	FF	11000-1000	Halo(S)	360	878	905	896	3.3	1.0e+16*2	4.0e+31*2	123	460	470	552
type II burst-shock	19970512 0530	19970512 0515-19970514 1600	19970515 0115	19970515 0159	19970515 0900-19970516 0000	-115	19970515 1300	FF	12000-80	Halo(S)	360	464	335	220	-15	4.2e+15*2	4.5e+30*2	264	450	480	616
type II burst-shock	19970521 2100	19970521 2020-19970521 2200	19970526 0909	19970526 0957	19970626 1600-19970527 1000	-74	19970527 0500	FF	5000-200	263	165	296	322	323	1.4	2.2e+15*2	9.7e+29*2	267	340	350	381
type II burst-shock	19970830 0130	19970903 0100-19970904 1400	19970903 0838	19970903 0800	19970903 1300-19970903 2100	-98	19970903 2300	FF	150-60	Halo(OA)	360	371	460	551	9.3	1.7e+15*2	1.2e+30*2	67	410	430	405
type II burst-shock	19971006 1528	19971007 0520-19971007 1230	19971010 1557	19971010 1612	19971010 2200-19971012 0000	-130	19971011 0400	FF	350-200	139	174	293	524	620	15.9	2.9e+15*2	1.2e+30*2	130	400	450	430
type II burst-shock	19971104 0610	19971104 0600-19971105 0430	19971106 2218	19971106 2248	19971107 0400-199771109 1200	-110	19971107 0500		14000-100	Halo(BA)	360	785	548	698	-22.1	7.5e+15*2	2.3e+31*2	243	400	460	640
type II burst-shock	19971106 1210	19971106 1220-19971107 0830	19971109 1003					FF	14000-100	Halo	360	1556	1346	1437	-44.1	5.5e+15*2	6.6e+31*2	262
type II burst-shock	19971127 1356	19971127 1330-19971127 1400	19971130 0715					FF	14000-7000	98	91	441	382	392	-4	5400000000000000	5.3e+30	113
type II burst-shock	19971206 1027	19971207 0730-19971208 1330	19971210 0433	19971210 0526	19971210 1800-19971212 0000	-60	19971211 1100	FF	200-60	317	223	397	567	525	9	2.0e+16*2	1.6e+31*2	396	350	380	460
type II burst-shock		19980121 1040-19980121 1230	19980124 0437					FF	600-300
type II burst-shock	19980228 1248	19980301 0630-19980301 1000	19980304 1102	19980304 1156	19980304 1300-19980306 0900	-36	19980302 1900	FF	300-200	236	55	495	494	488	-0.4	2.8e+14*2	3.4e+29*2	284	350	380	440
type II burst-shock	19980420 1007	19980420 1025-19980422 0600	19980423 1729			-69	19980424 0800	FF	10000-35	284	＞243	1863	2063	1944	43.5*1	2.4e+16*2	4.1e+32*2	278
type II burst-shock	19980429 1658	19980429 1630-19980429 1700	19980501 2121	19980501 2156	19980502 0500-19980504 0200	-85	19980503 1800	FF	10000-2000	Halo(BA)	360	1374	1151	1250	-44.8	1.0e+16*2	9.8e+31*2	336
type II burst-shock	19980502 1406	19980502 1425-19980502 1450	19980503 1702	19980504 0215	19980504 1000-19980507 2300	-205	19980504 0600	FF	5000-3000	Halo(BA)	360	38	697	871	-28.8	7.7e+15*2	3.4e+31*2	331	550	830	1150
type II burst-shock	19980527 1345	19980527 1330-19980527 1420	19980529 1512			-42	19980530 0300	FF	4000-1000	175	268	878	843	863	-3.7	1.1e+16*2	4.4e+31*2	306
type II burst-shock	19980611 1028	19980611 1015-19980611 1020	19980613 1918	19980613 1925	19980614 0400-19980615 0600	-55	19980614 1000	FF	8000-4000	123	177	1223	967	1145	-35.7	8.7e+15*2	6.5e+31*2	97	340	380
type II burst-shock		19980818 2300-19980818 2340	19980819 1840	19980819 1847	19980820 0600-19980821 2000	-67	19980820 2100	FF	14000-2000										320	340
type II burst-shock	19980824 2200	19980824 2205-19980826 0620	19980826 0640	19980826 0651	19980826 2200-19980828 0000	-155	19980827 1000	FF	14000-30										650	860	1260
type II burst-shock	19980923 0700	19980923 0720-19980924 2320	19980924 2320	19980923 2345	19980925 0600-19980926 1600	-207	19980925 1000	FF	2000-30										640	820	1020
type II burst-shock		19980930 1320-19981002 0700	19981002 0706			-56	19981002 2200	FF	14000-50
type II burst-shock		19981020 2100-19981929 2230	19981023 1258	19981023 1230	19981023 1500-19981024 1600	-52	19981924 0100	FF	14000-10000
type II burst-shock	19981105 2044	19981105 2200-19981107 0800	19981108 0441	19981108 0451	19981109 0100-19981111 0100	-149	19981108 0700	FF	5000-50	Halo(OA)	360	1118	949	1044	-24			300	450	640	740
type II burst-shock		19981111 0100-19981111 1800	19981112 0718			-124	19981113 1500	FF	150-70
type II burst-shock		19981223 0650-19981224 1500	19981226 0956					FF	14000-100
type II burst-shock		19990111 2203-19990111 2213	19990113 1047	19990113 1054	19990113 1500-19990113 2300	-112	19990113 2400	FF	4500-3200
type II burst-shock		19990120 1918-19990120 1946	19990122 2021	19990122 1950	19990123 0900-19990123 1800	-52	19990123 2300	FF	14000-2000
type II burst-shock		19990212 2230-19990214 1630	19990217 0712	19990217 0709	19990217 1600-19990218 1000	-34	19990217 1100	FF	200-35
type II burst-shock	19990622 1854	19990622 1825-19990622 1840	19990626 0231					FF	3000-2000	Halo(OA)	360	1133	934	1117	-24.7	9.7e+15*2	6.2e+31*2	40
type II burst-shock		19990630 2300-19990701 0900	19990702 0027					FF	120-70
type II burst-shock	19990703 1954	19990705 1800-19990706 2400	19990706 1424	19990706 1509	19990706 2100-19990707 0200	-4	19990706 1400	FF	80-40										460	500	620
type II burst-shock	19970723 2130	19990726 0100-19990726 1600	19990726 2350	19990726 2333	19990727 1700-19990729 1200	-38	19990722 2100	FF	150-60	75	123	329	307	316	-0.9	7.5e+15*2	4.1e+30*2	52
type II burst-shock		19990731 0100-19990802 1600	19990804 0144					FF	700-60
type II burst-shock	19990910 0754	19990910 0730-19990910 0735	19990912 0357					FF	5500-2000	18	125	1467	1335	1406	-30.2	9.7e+15*2	1.0e+32*2	1
type II burst-shock	19990920 0606	19990922 1345-19990922 1615	19990922 1209	19990922 1222	19990922 1900-19990924 0300	-173	19990922 2300	FF	3000-500	Halo(S)	360	604	549	357	-14.5	8.9e+14*2	1.6e+30*2	14
type II burst-shock	19991018 0006	19991017 2327-19991017 2333	19991021 0220	19991021 0225	19991021 0800-19991022 0700	-237	19990903 0700	FF	11500-10000	40	87	247	223	95	-2.7	3400000000000000	1e+30	40
type II burst-shock	20000208 0930	20000211 0845-20000211 2335	20000211 0235	20000211 0258	20000211 1600-20000211 2000	-25	20000209 2400	FF	50-23	Halo(BA)	360	1079	874	904	-35.3			50	420	510	630
type II burst-shock	20000210 0230	20000210 0155-20000210 0200	20000211 2334	20000211 2352	20000212 1200-20000213 0000	-133	20000212 1200	FF	14000-8000	Halo(BA)	360	944	1003	983	11.4	6.4e+13*2	2.8e+29*2	340	540	590	915
type II burst-shock	20000212 0431	20000212 0355-20000212 0920	20000214 0713	20000214 0731	20000214 1200-20000216 0800	-67	20000214 1400	FF	4000-400	Halo(BA)	360	1107	1047	1086	-8.3	1.6e+15*2	9.5e+30*2	20
type II burst-shock	20000217 2130	20000217 2042-20000218 2212	20000220 2103	20000220 2139	20000221 0500-20000222 1200	-26	20000221 2100	FF	14000-100	Halo(S)	360	728	545	581	-22.9			184	380	460	560
type II burst-shock	20000404 1632	20000404 1545-20000404 1600	20000406 1632	20000406 1639	20000407 0600-20000408 0600	-288	20000407 0100	FF	14000-9000	Halo(OA)	360	1188	1232	1199	12.8	4.5e+15*2	3.2e+31*2	265
type II burst-shock		20000428 0300-20000430 1200	20000430 0511					SR	60-25
type II burst-shock		20000619 0119-20000619 0122	20000623 1257	20000623 1303	20000624 0000-20000626 0800	-34	20000624 0800	FF	3800-1900
type II burst-shock	20000711 1327	20000711 1300-20000711 1330	20000713 0943	20000713 0942	20000713 1300-20000714 1500	-43	20000713 2200	FF	12000-1000	Halo(OA)	360	1078	850	902	-42.9			63	610	760	940
type II burst-shock	20000712 2030	20000712 2005-20000712 2035	20000713 0959					FF	6000-1000	281	101	820	789	810	-3.2	7400000000000000	2.5e+31	281
type II burst-shock	20000717 0854	20000717 2030-20000717 2100	20000719 1530	20000719 1527	20000720 0100-20000721 0800	-93	20000720 1000	FF	3000-1000	95	116	788	1060	1025	30.7	7500000000000000	2.3e+31	61	530	630
type II burst-shock		20000719 0905-20000719 0915	20000721 0705					SF	3000-1000
type II burst-shock	20000723 0530	20000726 0930-20000727 0700	20000726 1900	20000726 1857	20000727 0200-20000728 0200	-42	20000727 0300	FF	140-85
type II burst-shock	20000912 1154	20000912 1200-20000913 1220	20000915 0427					FF	14000-60	Halo(BA)	360	1550	1839	1729	58.2	2.2e+16*2	2.6e+32*2	220
type II burst-shock	20000925 0250	20000925 0220-20000925 0300	20000930 1116					FF	14000-1000	Halo(BA)	360	587	475	0	-25.2	9.6e+14*2	1.7e+30*2	202
type II burst-shock		20000930 1300-20001001 2200	20001003 0102	20001003 0054	20001003 1000-20001005 0300	-143	20000104 2100	FF	130-60
type II burst-shock	20001025 0826	20001025 0930-20001025 2400	20001028 0930	20001028 0954	20001028 2100-20001029 2200	-127	20001029 0400	FF	10000-300	Halo(OA)	360	770	948	885	17.4	1.7e+16*2	5.1e+31*2	275	380	420	565
type II burst-shock		20001029 0200-20001030 1800	20001031 1709					FF	10000-60
type II burst-shock		20001101 1940-20001102 1300	20001104 0225					FF	650-40
type II burst-shock	20001103 1826	20001103 1835-20001103 1845	20001106 0930	20001106 0948	20001106 1700-20001108 0300	-159	20001106 2200	FF	4000-2500	Halo(S)	360	291	475	643	16.4	4.8e+15*2	2.1e+30*2	57	510	610	660
type II burst-shock	20001108 2306	20001108 2320-20001109 1200	20001110 0619					FF	4000-200	271	＞170	1738	1881	2023	69.9			299
type II burst-shock	20001109 1615	20001109 1615-20001111 0400	20001111 0412	20001111 0400	20001111 0800-20001112 0000	-37	20001110 1000	FF	10000-40
type II burst-shock	20001124 1530	20001124 1525-20001124 2200	20001126 0532					FF	14000-200	Halo(BA)	360	1245	1219	1238	-3.3	1.4e+16*2	1.1e+32*2	324
type II burst-shock		20001124 1740-20001124 1752	20001126 1143					FF	2200-1700
type II burst-shock		20001126 1700-20001126 1715	20001128 0525	20001128 0530	20001128 1100-20001129 2200	-119	20001129 1400	FF	14000-7000										540	580	720
type II burst-shock	20001218 1150	20001217 2000-20001218 1700	20001222 1939	200012221925	20001223 0000-20001223 1200	-62	20001223 0500	FF	200-120										320	330	380
type II burst-shock		20010106 2200-20010107 1000	20010110 1609					FF	150-120
type II burst-shock	20010120 2130	20010120 2130-20010120 2400	20010123 1049	20010123 1048	20010124 0900-2001 0126 0700	-61	20010124 1900	FF	14000-500	Halo(OA)	360	1507	1264	1437	-41.1	1.8e+16*2	2.0e+32*2	71	400	550	680
type II burst-shock	20010128 1554	20010128 1545-20010128 1700	20010131 0835					FF	14000-200	Halo	360	916	951	932	3.5	1.2e+16*2	5.0e+31*2	254
type II burst-shock	20010211 0131	20010211 0140-20010211 0155	20010213 0428					FF	12000-5500	Halo(OA)	360	1183	1170	1179	-1.7	8.3e+15*2	5.8e+31*2	335
type II burst-shock	20010327 0206	20010327 0235-20010327 0315	20010327 0200					FF	6000-1000	154	60	300	332	529	8.7*1	510000000000000	2.3e+29	145
type II burst-shock		20010328 1130-20010328 1220	20010329 0533					FF	3000-600
type II burst-shock	20010329 1026	20010329 1012-20010330 0600		20010331 2200	20010401 0400-20010403 1500				4000-60	Halo(BA)	360	942	965	957	3.5	2.8e+15*2	1.2e+31*2	71	600	820	700
type II burst-shock	20010402 2206	20010402 2205-20010403 0230	20010404 1439	20010404 1455		-50	20010405 0800	FF	14000-250	261	244	2505	2827	2634	108.5*1	9.2e+15*2	2.9e+32*2	293	650	780	1020
type II burst-shock	20010406 1930	20010406 1935-20010407 1700	20010408 1120	20010408 1101	20010408 1400-20010409 0400	-59	20010408 1600	FF	14000-60	Halo(BA)	360	1270	914	1215	-57.3	8.4e+15*2	6.8e+31*2	147	740	780	1050
type II burst-shock		20010406 2150-20010406 2230	20010407 1756					FF	3000-1200
type II burst-shock	20010410 0530	20010410 0524-20010410 2400	20010411 1409	20010411 1343	20010411 2200-20010413 0700	-271	20010411 2400	FF	14000-100	Halo(OA)	360	2411	2876	2974	211.6*1	9.1e+15*2	2.7e+32*2	166	640	740	1290
type II burst-shock	20010415 1405	20010415 1405-20010416 1300	20010418 0049	20010418 0046	20010418 1200-20010420 1100	-114	20010418 0700	FF	14000-40	145	167	1199	994	1064	-35.9	8.2e+16*2	5.9e+32*2	268
type II burst-shock	20010418 0230	20010418 0255-20010418 1400	20010421 1529	20010421 1601	20010421 2300-20010423 0300	-102	20010422 1600	FF	1000-100	Halo(OA)	360	2465	2433	2455	-9.5	6.1e+15*2	1.9e+32*2	263
type II burst-shock	20010426 1230	20010426 1240-20010428 0500	20010428 0500	20010428 0501	20010428 1400-20010501 0200	-47	20010429 0300	FF	5000-20	Halo(OA)	360	1006	1171	1084	21.1			37	550	730	1040
type II burst-shock		20010504 0600-20010505 1400	20010506 0906					FF	350-120
type II burst-shock		20010615 1145-20010615 1215	20010617 1304					SR	13000-8000
type II burst-shock	20010615 1556	20010615 1605-20010615 1620	20010618 0207					FF	14000-3500	Halo(OA)	360	1701	1984	1793	56.9*1	7.4e+15*2	1.1e+32*2	255
type II burst-shock		20010912 1000-20010912 2200	20010913 0231	20010913 0231	20010913 1800-20010914 2200	-57	20010913 0800	FF	140-60
type II burst-shock		20010913 1740-20010914 0545	20010914 0159					FF	180-100
type II burst-shock	20010924 1030	20010924 1045-20010925 2000	20010925 2017					FF	7000-30	Halo(OA)	360	2402	2580	2500	54.1	2.2e+16*2	6.5e+32*2	142
type II burst-shock	20011005 1030	20011005 1035-20011005 1145	20011008 1305					FF	10000-1200	Halo(OA)	360	1537	1557	1542	3.3	1.8e+16*2	2.2e+32*2	222
type II burst-shock	20011009 1130	20011009 1115-20011009 1600	20011011 1650	20011011 1701	20011012 0400-20011012 0900	-71	20011012 1300	FF	8000-200	Halo(OA)	360	973	682	811	-41.5	1.2e+16*2	5.6e+31*2	184	56-	570	780
type II burst-shock	20011019 0127	20011019 0115-20011019 0225	20011022 0041					FR	14000-1300	Halo(BA)	360	558	246	272	-25.6	6.3e+15*2	9.8e+30*2	284
type II burst-shock	20011019 1650	20011019 1645-20011021 1640	20011021 1640	200011021 1648	20011021 2000-20011025 1000	-187	20011021 2100	FF	14000-30	Halo(BA)	360	901	895	898	-0.7	9.0e+15*2	3.6e+31*2	273	460	680	870
type II burst-shock	20011022 1506	20011022 1515-20011022 1740	20011025 0859					FF	8000-1200	Halo(BA)	360	901	895	898	-0.7	9.0e+15*2	3.6e+31*2	273
type II burst-shock	20011025 1526	20011025 1530-20011027 2300	20011028 0313	20011028 0319	20011029 2200-20011031 1300	-157	20011028 1200	FF	14000-30	Halo(OA)	360	1092	1080	1087	-1.4	4.2e+15*2	2.5e+31*2	175	360	510	694
type II burst-shock		20011028 1400-20011029 2400	20011031 1347	20011031 1348	20011031 2000-20011102 1200	-106	20011101 1100	FF	725-190
type II burst-shock		20011109 1845-20011110 0600	20011110 1954					SF	14000-450
type II burst-shock	20011117 0530	20011117 0535-20011118 0640	20011119 1815	20011119 1815	20011119 2200-20011121 1300	-47	20011119 2200	FF	175-90	Halo(OA)	360	1379	1249	1350	-22.5	1.3e+16*2	1.2e+32*2	58	430	570	680
type II burst-shock	20011122 2330	20011122 2240-20011124 0230	20011124 0551	20011124 0656	20011124 1400-20011125 2000	-221	20011124 1700	FF	14000-40	Halo(BA)	360	1437	1371	1409	-12.9	1.8e+16*2	1.8e+32*2	349	720	1040	1320
type II burst-shock	20011226 0530	20011226 0520-20011227 0500	20011229 0517	20011229 0538	20011230 0000-20011230 1800	-58	20011230 0600	FF	14000-150	281	＞212	1446	1284	1295	-39.9	4.8e+15*2	5.0e+31*2	266	400	460	580
type II burst-shock	20020114 0535	20020114 0625-20020114 2130	20020117 0526					FF	12000-100	Halo(OA)	360	1492	1795	1664	52.3	3.4e+16*2	3.8e+32*2	246
type II burst-shock	20020127 1230	20020127 1235-20020127 1700	20020131 2138					FF	14000-300	Halo(OA)	360	1136	1000	1068	-19.2	1.9e+16*2	1.2e+32*2	312
type II burst-shock		20020214 0010-20020214 1350	20020217 0124					SF	800-200
type II burst-shock	20020315 2306	20020315 2245-20020315 2330	20020318 1314	20020318 1322	20020319 0500-20020320 1600	-37	20020319 0700	FF	14000-6000	Halo(BA)	360	957	784	917	-17.4				380	470	667
type II burst-shock	20020320 1706	20020322 1310-20020322 1335	20020323 1124	20020323 1137	20020324 1200-20020325 2000	-100	20020324 1000	FF	3000-2000	Halo(S)	360	603	501	344	-15.8			89	450	500	625
type II burst-shock	20020410 1327	20020410 1259-20020410 1302	20020414 1256					FF	13000-12000	340	159	650	759	876	21.2	2.3e+15*2	4.9e+30*2	11
type II burst-shock	20020415 0350	20020415 0335-20020415 0415	20020417 1101	20020417 1107	20020417 1600-20020419 1500	-127	20020418 0800	FF	11000-1500	Halo(BA)	360	720	742	731	2.1	1.9e+15*2	5.0e+30*2	198	480	610	750
type II burst-shock	20020417 0826	20020417 0830-20020419 0400	20020419 0825					FF	5000-40	Halo(OA)	360	1240	1103	1198	-19.8			292
type II burst-shock	20020421 0127	20020421 0130-20020421 2400	20020423 0500					FF	10000-60	Halo(OA)	360	2393	2388	2391	-1.4			282
type II burst-shock	20020516 0050	20020516 0150-20020516 0330	20020520 0335	20020520 0340	20020520 1000-20020521 2200	-36	20020521 0300	FF	9000-2000	Halo(BA)	360	600	506	567	6.6*1	4.2e+15*2	7.7e+30*2	158	420	510	420
type II burst-shock	20020522 0326	20020522 0410-20020523 1040	20020523 1044	20020523 1050	20020523 2000-20020525 1800	-109	20020523 1800	FF	500-30
type II burst-shock	20020715 2030		20020717 1555	20020717 1603	20020718 1200-20020719 0900	-17	20020718 1200	FF	1000-100	Halo(BA)	360	1151	973	1099	-25.6			35	460	520	955
type II burst-shock	20020729 1207	20020729 1210-20020729 1245	20020801 2309	20020801 2309	20020802 0600-20020804 0200	-102	20020802 0600	FF	4200-1300	13	＞236	562	512	532	-4.3			301	460	520	500
type II burst-shock	20020816 1230	20020816 1220-20020817 2100	20020818 1840	20020818 1846	20020819 1200-20020821 1400	-106	20020821 0700	FF	14000-60	Halo(OA)	360	1585	1239	1447	-67.1			121	460	580	766
type II burst-shock	20020905 1654	20020905 1655-20020907 1622	20020907 1622	20020907 1636	20020908 0400-20020908 2000	-181	20020908 0100	FF	16000-30	Halo(OA)	360	1748	1855	1903	43			114	470	550	880
type II burst-shock	20020927 1356	20020927 1335-20020927 1430	20020930 0754	20020930 0815	20020930 2000-20021001 1500	-176	20020901 1700	FF	14000-8000										380	410
type II burst-shock	20021109 1331	20021109 1320-20021110 0300	20021109 1724					FF	14000-100	Halo(OA)	360	1838	1977	1917	35.4	1.1e+16*2	1.8e+32*2	233
type II burst-shock	20030528 0050	20030528 0100-20030529 0030	20030529 1831			-144	20030529 2400	FF	1000-200	Halo(BA)	360	1366	1527	1414	25.9*1	1.3e+16*2	1.2e+32*2	292
type II burst-shock	20030529 0127	20030529 0110-20030529 0800	20030530 1553			-91	20030602 0900	FF	13000-200	Halo(BA)	360	1237	1104	1184	-22.3	3.9e+15*2	3.0e+31*2	260
type II burst-shock		20030616 0000-20030616 0300	20030618 0442					FF	14000-400
type II burst-shock	20030617 2318	20030617 2250-20030618 0530	20030618 0901			-141	20030618 1000	SF	10000-200	Halo(OA)	360	1813	1800	1811	-2.9	1.7e+16*2	2.7e+32*2	117
type II burst-shock	20031028 1130	20031028 1130-20031028 1500	20031029 0558			-383	20031030 2300	FF	14000-5000	Halo(S)	360	2459	2229	2268	-105.2			15
type II burst-shock	20031118 0950	20031118 1015-20031118 1130	20031120 0835			-422	20031120 2200	FF	5000-2000	95	＞197	1824	2133	1941	59.6	2.2e+16*2	3.6e+32*2	87
type II burst-shock	20040722 0731	20040723 1900-20040723 1935	20040724 0532	20040724 0613	20040724 1400-20040725 1500	-136	20040725 1700	FF	1000-2500	66	151	700	725	749	4.8*1	1.2e+15*2	2.9e+30*2	31	560	610	890
type II burst-shock	20040725 1454	20040725 1510-20040725 2030	20040726 2225	20040726 2249	20040727 0200-20040727 2200	-170	20040727 1400	FF	14000-2000	Halo(BA)	360	1333	1366	1359	7	1.1e+16*2	9.5e+31*2	204	870	1000	1302
type II burst-shock	20041107 1654	20041107 1625-20041108 2000	20041109 1825	20041109 1825	20041109 2000-20041111 2300	-263	20041110 1100	FF	14000-60	Halo(BA)	360	1759	1696	1713	-19.7	1.4e+16*2	2.2e+32*2	0	640	810	830
type II burst-shock		20041107 1710-20041107 1815	20041109 0925					FF	14000-10000
type II burst-shock		20050104 1120-20050104 1135	20050108 0015					FF	13000-6000
type II burst-shock	20050113 1754	20050115 0700-20050115 0830	20050116 0927	20050116 1100	20050108 2100-20050109 1800			FF	14000-7000	Halo	360	485	540	729	13.6*1	4.2e+14*2	5.1e+29*2	97	460	520	570
type II burst-shock	20050503 0026	20050503 0020-20050503 0110	20050506 1208					FF	14000-1500	82	＞66	978	945	939	-6			61
type II burst-shock	20050506 1728	20050506 1752-20050506 1803	20050508 1701					FR	5000-4000	Halo	360	1128	863	1067	-38.1			119
type II burst-shock	20050513 1712	20050513 1700-20050515 0210	20050515 0210	20050515 0238	20050515 0600-20050519 0000	-247	20050515 0900	FF	5000-40	Halo	360	1689						2	630	950	1270
type II burst-shock	20050707 1706	20050707 1630-22050707 1640	20050710 0242	20050710 0337	20050710 1000-20050712 0400	-92	20050710 2100	FF	4000-2000	Halo	360	683	636	574	-8.7			39	430	480	720
type II burst-shock	20050713 1430	20050713 1415-20050713 1505	20050716 0140					FF	14000-1000	Halo	360	1423	1342	1390	-14.1	1.8e+16*2	1.8e+32*2	303
type II burst-shock		20050714 0745-20050714 0815	20050716 1610					FF	8000-4000
type II burst-shock		20050714 1055-20050714 1240	20050717 0052	20050717 0134	20050717 1400-20050718 2300	-67	20050718 0700	FF	6000-800
type II burst-shock	20050730 0650	20050730 0740-20050731 2000	20050801 0600					FF	9000-80	Halo	360	1968	1595	1851	-102.6			50
type II burst-shock	20050821 1730	20050822 1715-20050823 1300	20050824 0824					FF	12000-40	Halo	360	2378	2612	2585	108.0*1	6.3e+15*2	1.8e+32*2	227
type II burst-shock	20050822 0131	20050822 0130-20050822 0335	20050824 0535	20050824 0613	20050824 1400-20050824 2300	-216		FF	8000-550	Halo	360	1194	1086	1127	-17.8	5.3e+15*2	3.8e+31*2	220	660	710	790
type II burst-shock	20050831 1130	20050831 1140-20050831 1210	20050902 1350	20050902 1419	20050902 1800-20050903 0400	-60	20050903 0300	FF	6000-800	Halo	360	825	1116	1165	42.9	2.4e+15*2	8.1e+30*2	287	650	680	840
type II burst-shock		20050907 1805-20050907 2400	20050909 1333					FF	12000-200
type II burst-shock		20050910 2145-20050911 0100	20050912 0600	20050912 0605	20050912 2000-20050913 1300	-88	20050913 0100	FF	14000-300
type II burst-shock	20050909 1948	20050909 1945-20050910 2200	20050911 0057	20050911 0114	20050911 0500-20050912 0700	-139	20050911 1100	FF	10000-50	Halo	360	2257	1810	2054	-128.6	1.6e+17*2	4.2e+33*	115	900	1100	1423
type II burst-shock	20050911 1300	20050911 1310-20050911 1515	20050915 0836					FF	3000-350	Halo	360	1922	1913	1917	-2	1.2e+16*2	2.3e+32*2	125
type II burst-shock		20050913 2020-20050915 0600	20050915 0839					FF	1100-35
type II burst-shock	20060706 0854	20060706 0845-20060706 1718	20060709 2040	20060709 2136	20060710 2100-20060711 1900	-27	20060710 2300	FF	4000-300	Halo	360	911	995	944	8.2			205	380	430	488
type II burst-shock	20060816 1630	20060816 1545-20060816 2215	20060819 1057	20060819 1131	20060820 1300-20060821 1600	-79	20060820 0200	FF	14000-400	Halo	360	888	905	896	1.9	1.0e+16*2	4.0e+31*2	161	400	470	620
type II burst-shock	20061105 1754	20061105 1735-20061105 1920	20061109 1153					FF	14000-400	39	196	1398	653	1531	-167	7.0e+15*2	6.8e+31*2	78
type II burst-shock	20061213 0254	20061213 0245-20061213 1040	20061214 1351	20061214 1414	20061214 2200-20061215 1300	-162	20061215 0800	FF	12000-150	Halo	360	1774	1622	1573	-61.4	4.7e+15*2	7.4e+31*2	193	740	900	1180
type II burst-shock	20061213 2230	20061214 2230-20061214 2340	20061216 1734	20061216 1755	20061217 0000-20061217 0700	-56	20061216 1700	FF	14000-1500	Halo	360	1042	1039	1041	-0.4	7.5e+15*2	7.5e+15*2	248	580	680	980
type II burst-shock		20090203 2030-20090924 0100	20090203 1921	20090203 2000	20090204 0000-20090204 1600	-42	20090204 1900	FF	470-20										360	380
type II burst-shock	20100801 0845	20100801 0920-20100801 1730	20100803 1705	20100803 1741	20100804 1000-20100805 0000	-74	20100804 2000	FF	2000-700										530	590	740
type II burst-shock	20110215 0224	20110215 0210-20110215 0700	20110218 0049	20110218 0130	20110218 1900-20110220 0800	-32	20110218 1600	FF	16000-400	Halo	360	669	508	471	-18.3	4.3e+15*2	9.7e+30*2	189	470	600	590
type II burst-shock	20110602 0812	20110602 0800-20110602 0825	20110604 2006	20110604 2045	20110605 0200-20110605 1900	-45	20110605 0600	FF	15000-4000	Halo	360	976	999	996	3.6	1.4e+15*2	6.8e+30*2	98	510	560	680
type II burst-shock	20110607 0649	20110607 0645-20110607 1800	20110607 0914					FF	16000-250	Halo	360	1255	1258	1256	0.3	2.3e+16*2	1.8e+32*2	250
type II burst-shock	20110804 0412	20110804 0415-20110805 1700	20110805 1732	20110805 1751	20110805 0500-20110805 1400	-15	20110805 0500	FF	13000-60	Halo	360	1315	1074	1208	-41.1	1.1e+16*2	9.3e+31*2	298	430	440	670
type II burst-shock	20110924 1248	20110924 1250-20110924 2245	20110926 1144	20110926 1234	20110926 2000-20110928 1500	-118	20110926 2400	FF	16000-300	Halo	360	1915	2254	2089	79.6	1.6e+16*2	3.0e+32*2	78	580	700	870
type II burst-shock	20111126 0712	20111126 0715-20111127 2400	20111128 2100	20111128 2150	20111129 0000-20111129 0800	-25	20111129 1000	FF	10000-50	Halo	360	933	1012	975	9	1.2e+16*2	5.2e+31*2	327	450	510	670		20111126	20111126	20111126
type II burst-shock	20120119 1436	20120119 1500-20120120 0245	20120122 0533	20120122 0611	20120122 2300-20120123 0700	-78	20120123 0600	FF	16000-100	Halo	360	1120	1499	1390	54.1	1.9e+16*2	1.2e+32*2	20	450	460	670
type II burst-shock	20120324 0024	20120324 0040-20120324 1040	20120324 1107					FR	16000-300	Halo	360	1152	825	1020	-46.6	1.4e+16*2	9.3e+31*2	347
type II burst-shock	20120712 1648	20120712 1645-20120713 0900	20120714 1739	20120714 1809	20120715 0600-20120717 0500	-139	20120715 1700	FF	14000-250	Halo	360	885	1092	2265	195.6*1	6.9e+15*2	2.7e+31*2	158	490	670	850
type II burst-shock	20120928 0012	20120927 2355-20120928 1015	20120930 2218	20120939 2305	20121001 0000-2012 1002 0000	-122	20121001 0500	FF	16000-250	Halo	360	947	716	817	-27.1	9.2e+15*2	4.1e+31*2	251	370	410	590
type II burst-shock	20130116 1900	20130116 2200-20130117 0130	20130117 0023	20130117 1600	20130117 1600-20130118 1200	-52	20130117 2400	FF	1000-200	211	250	648	586	616	-4.9	6.1e+15*2	1.3e+31*2	236	390	400	420
type II burst-shock	20130315 0712	20130315 0700-20130315 2130	20130317 0521	20130317 0559	20130317 1500-20130319 1600	-132	20130317 2100	FF	14000-1000	Halo	360	1063	1247	1161	25.8	1.3e+16*2	7.5e+31*2	112	520	720	890
type II burst-shock	20130411 0724	20130411 0710-20130411 1500	20130413 2213	20130413 2254	20130414 1700-20130415 2300		20130415 1100	FF	10000-200	Halo	360	861	792	819	-8.1	2.2e+16*2	8.2e+31*2	85	410	520	660
type II burst-shock	20130421 2036	20130421 2025-20130421 2212	20130423 0329					FF	14000-1700	255	212	561	469	470	-8.3	2.7e+15*2	4.3e+30*2	260
type II burst-shock	20130522 1325	20130522 1310-20130524 0600	20130524 1726					FF	16000-150	Halo	360	1466	1394	1438	-13.2	3.3e+16*2	3.5e+32*2	187
type II burst-shock	20130830 0248	20130830 0234 20130831 0400	20130902 0156					FF	14000-50	Halo	360	949	805	884	-17.1	7.5e+15*2	3.4e+31*2	55
type II burst-shock	20130929 2212	20130929 2153-20130930 2100	20131002 0115	20131002 0154	20131002 2300-2013 1003 2200	-72	20131002 0800	FF	14000-60	Halo	360	1179	1142	1164	-5.3	2.2e+16*2	1.5e+32*2	343	470	630	800
type II burst-shock	20131026 0312	20131026 0301-20131026 0400	20131026 2126					FF	14000-200	271	208	473	482	487	1.3	1.6e+15*2	1.8e+30*2	167
type II burst-shock	20131028 0448	20131028 0441-20131028 1151	20131029 0933					FF	14000-200	315	156	1201	881	1116	-45.2	6.3e+15*2	4.5e+31*2	313
type II burst-shock	20140106 0800	20140106 0757-20140106 2230	20140107 1434					FF	14000-80	Halo	360	1402	1360	1385	-7.1	2.0e+16*2	1.9e+32*2	274
type II burst-shock	20140212 0612	20140214 0830-20140214 1300	20140215 1246	20140215 1316	20140215 0500-20140216 1600		20140216 1200	FF	16000-300										380	450	530
type II burst-shock	20140218 0136	20140218 0216-20140218 0251	20140219 0309	20140219 0348	20140219 1200-20140220 0300	-119	20140219 1000	FF	2000-900	Halo	360	779	674	712	-11.3	1.1e+16*2	3.5e+31*2	44	520	530
type II burst-shock	20140325 0536	20140325 0752-20140325 1130	20140325 1910					FF	1700-400	261	223	651	688	680	3.4	4.3e+15*2	9.0e+30*2	269
type II burst-shock	20140418 1325	20140418 1305-2014 0418 2250	20140420 1020					FF	14000-250	Halo	360	1203	1279	1245	13.5	2.0e+16*2	1.4e+32*2	238
type II burst-shock		20140606 1250-20140607 0315	20140607 1611	20140607 1652		-37	20140608 2400	FF	16000-160
type II burst-shock		20140623 0300-20140623 1800	20140623 2216					FF	60-32
type II burst-shock	20150324 0824	20150324 0900-20150324 1147	20150325 0911					NN	14000-400	Halo	360	1794	1626	1727	-34.4	1.4e+16*2	2.2e+32*2	255
type II burst-shock	20150505 2224	20150505 2224-20150505 2314	20150506 0055					FF	14000-500	Halo	360	715	547	685	-13.6	3.9e+16*2	1.0e+32*2	41
type II burst-shock	20150621 0236	20150621 0233-20150621 2120	20150622 1808	20150622 1833	20150623 0200-20150624 1400	-198	20150623 0500	FF	5500-150	Halo	360	1366	1477	1434	21.2*1	9.6e+15*2	9.0e+31*2	72	610	740	1040
type II burst-shock	20150622 1836	20150622 1820-20150622 2155	20150624 1307	20150624 1329	20150625 1000-20150626 0600	-81	20150625 1700	FF	14000-300	Halo	360	1209	1065	1147	-25.1	4.4e+15*2	3.2e+31*2	358	550	720	960
type II burst-shock	20150918 0500	20150918 0454-20150918 0952	20150920 0523	20150920 0604	20150921 0800-20150922-0100			FF	14000-400	201	131	823	1196	1030	35.5	7.8e+15*2	2.7e+31*2	188	510	600	850
type II burst-shock	20151216 0936	20151216 0845-20151216 0857	20151219 1538	20151219 1616	20151220 0300-20151221 2000	-166	20151220 2300	FF	5300-3800	Halo	360	579	529	487	-6.7	2.3e+15*2	3.9e+30*2	334	400	490	540
type II burst-shock	20151228 1212	20151228 1150-20151228 2145	20151231 0017	20151231 0050	20151231 1700-20160102 1100	-116	20160101 0100	FF	14000-180	Halo	360	1221	1243	1228	4.6*1	1.9e+16*2	1.4e+32*2	163	440	480	690
type II burst-shock	20170904 2012	20170904 2027-20170905 0454	20170906 2302	20170906 2347	20170907 2000-20170908 0400			FF	14000-2100	无									490	580	820
type II burst-shock	20170906 1224	20170906 1205-20170907 0800	20170907 2228	20170907 2302	20170908 1100-20170910 2100	-122		FF	16000-70	Halo	360	1571	1569	1570	-0.3	2.9e+16*2	3.6e+32*2	201	590	800	1210
